# Supplementary material for: Large-scale automated identification of mouse brain cells in confocal light sheet microscopy images
Source: PubMed Central journal article supplement — Bioinformatics. 2014 Aug 22;30(17):i587–93. doi: 10.1093/bioinformatics/btu469 (PMC4147922; doi:10.1093/bioinformatics/btu469), 2014-08-22
Supplement: supp_btu469_H_152_Supplementary_File.pdf [file supp_btu469_H_152_Supplementary_File.pdf]

## Supplementary material

---

# **Large-Scale Automated Identification of Mouse Brain Cells in Confocal Light Sheet Microscopy Images**

Paolo Frasconi <sup>1</sup>, Ludovico Silvestri <sup>2</sup>, Paolo Soda <sup>3</sup>, Roberto Cortini <sup>1</sup>, Francesco S. Pavone <sup>2</sup>, and Giulio Iannello <sup>3</sup>

<sup>1</sup>Department of Information Engineering (DINFO), Università di Firenze. <sup>2</sup>European Laboratory for Nonlinear Spectroscopy (LENS), Università di Firenze. <sup>3</sup>Integrated Research Centre, Università Campus Bio-Medico di Roma.

Supplementary Figure S1. Pipeline of the overall cell identification method

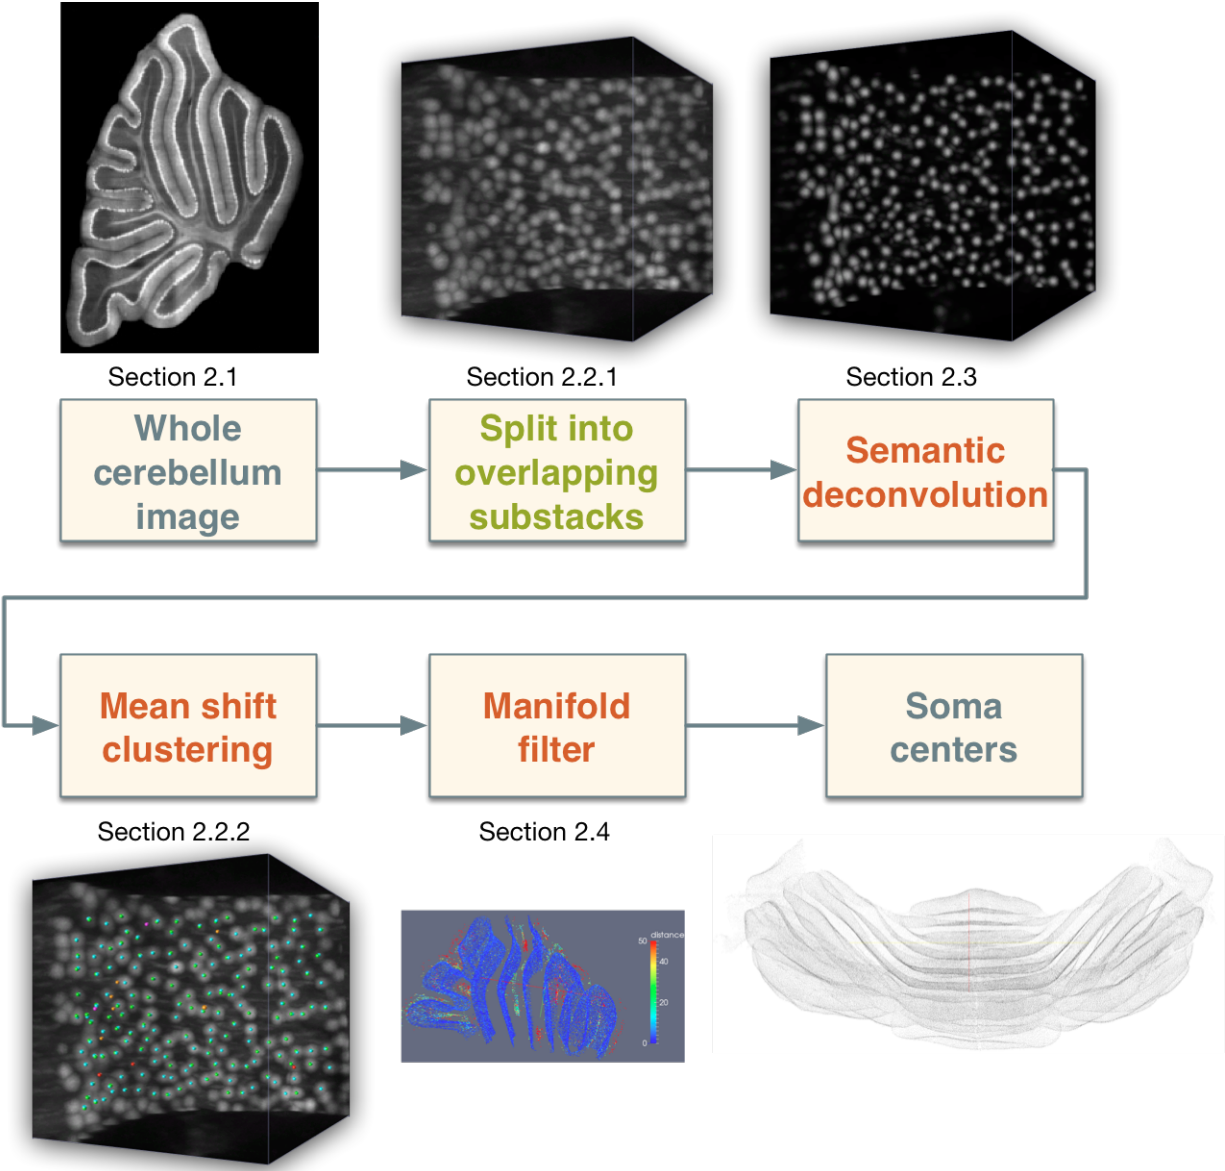

**Supplementary Figure S2. Illustration of manifold filtering. The figure shows a portion of the Purkinje centers point cloud, with colors denoting the estimated manifold distance**

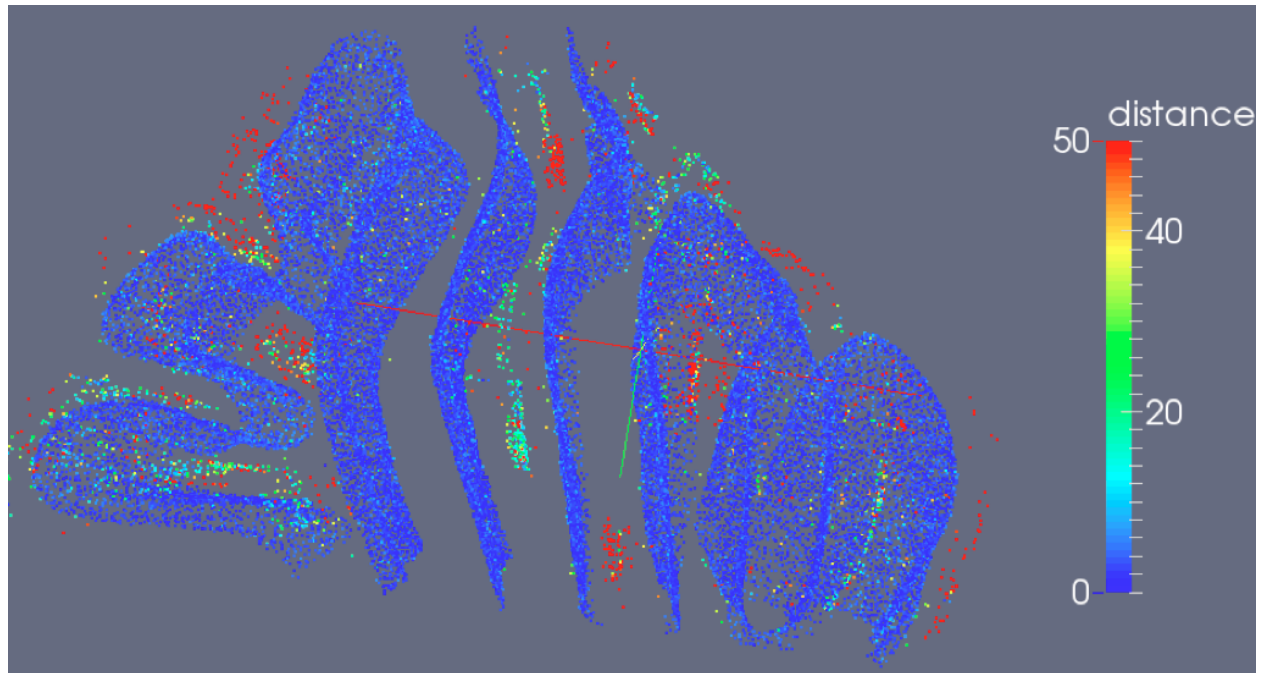

Supplementary Figure S3. Neural network used for semantic deconvolution

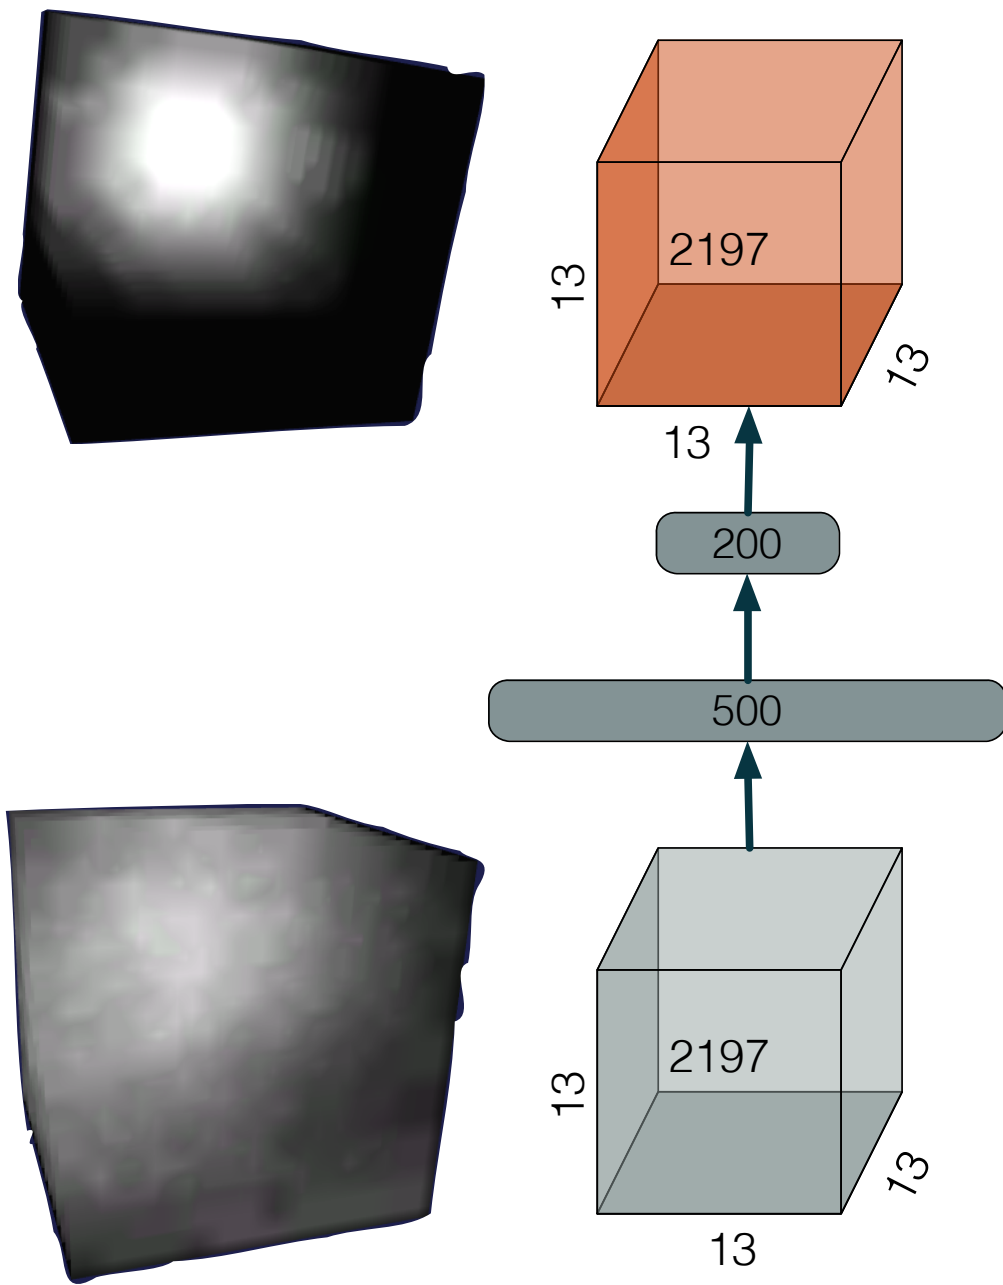

# Supplementary Figure S4. Some of the filters learned in the first layer of the semantic deconvolution neural network

Each cell in the figure shows one 13x13x13 filter (i.e. the 2197 weights of one of the hidden units in the first layer) as a sequence of 13 2D images (one for each z coordinate). Color indicates the weight strength (blue is low intensity, red is high intensity)

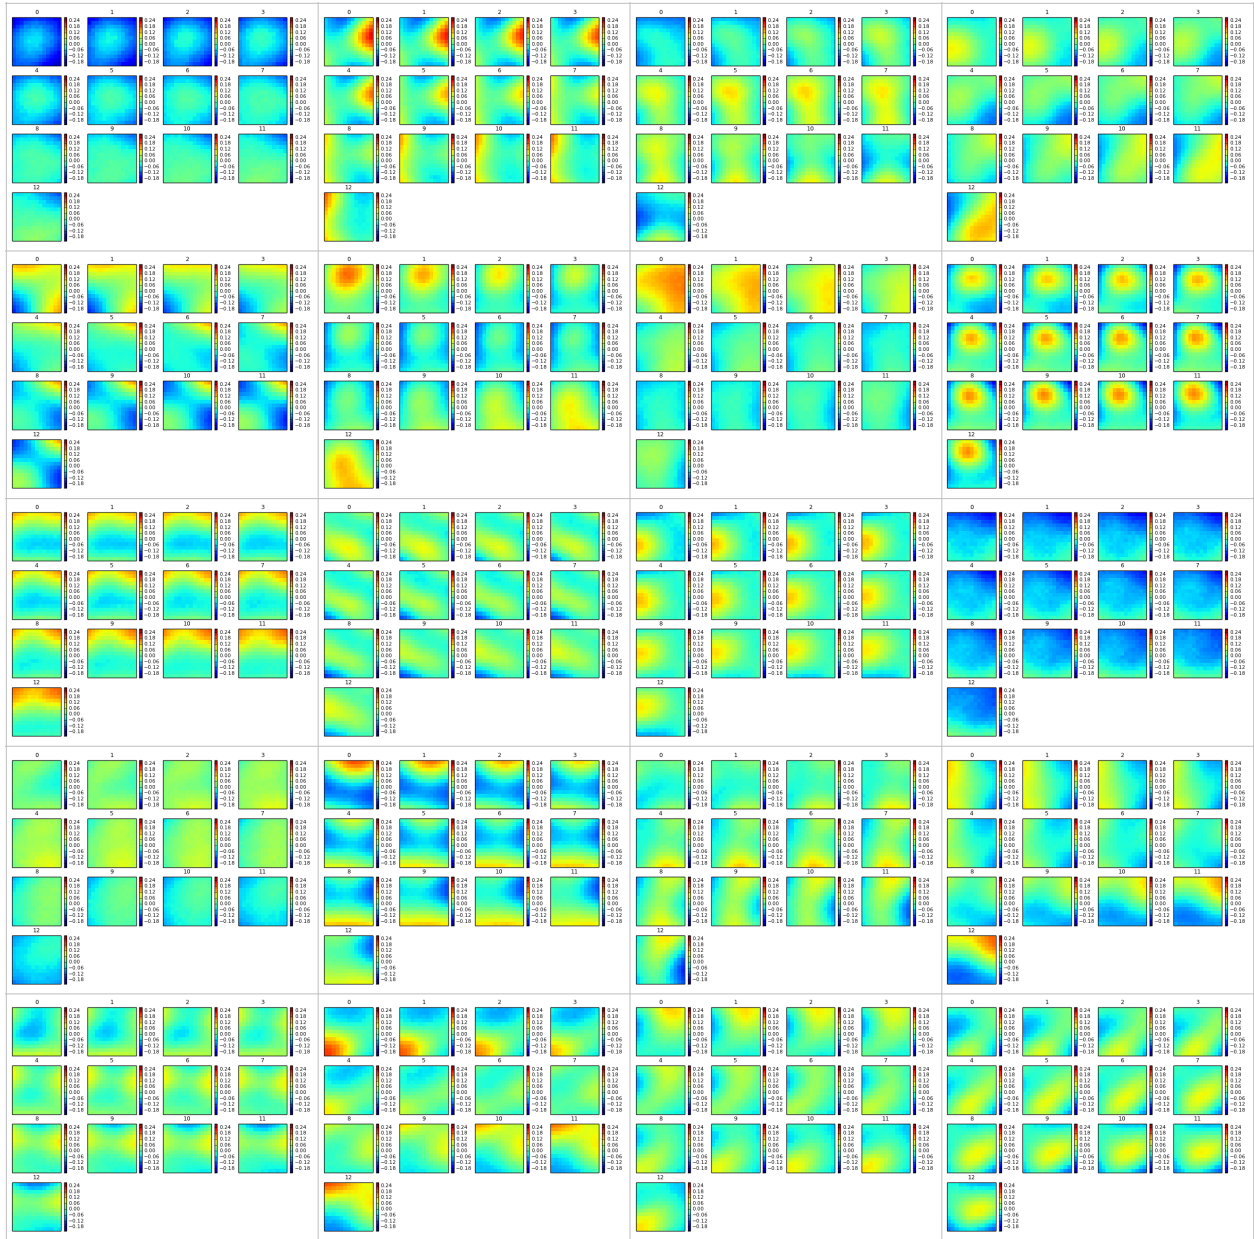

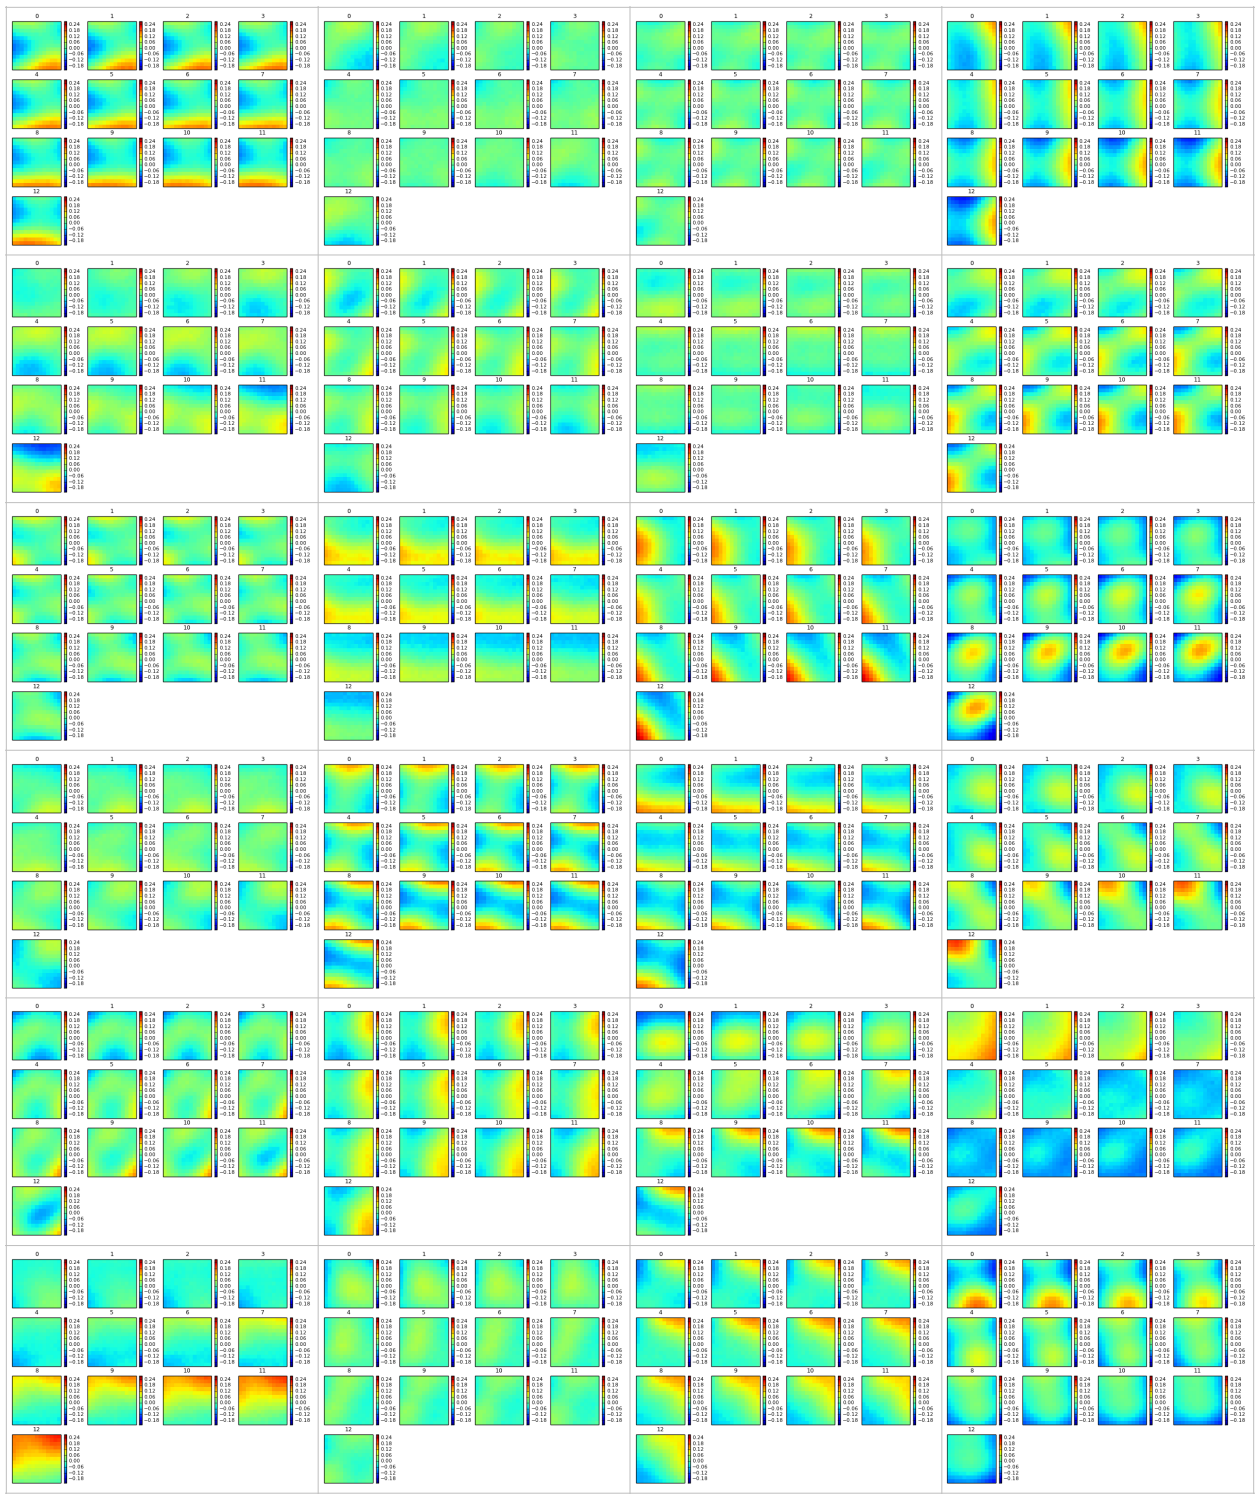

## **The final set of predicted Purkinje soma centers**

The file Cloud-xyz-d-sid.vtk.bz2 (available as supplementary data) contains a VTK file with 3D coordinates of the whole set of predicted Purkinje soma centers. Besides XYZ coordinates, it contains two scalars: distance is the estimated manifold distance, SID is the substack ID.

The file can be visualized with the help of programs such as Cloud Compare (<http://www.danielgm.net/cc/>) or Paraview (<http://www.paraview.org/>), both available for Linux, Mac or Windows.
